# Supplementary material
Source: bioRxiv or medRxiv preprint supplement (https://www.biorxiv.org/highwire/filestream/128265/field_highwire_adjunct_files/0/425041-1.pdf)

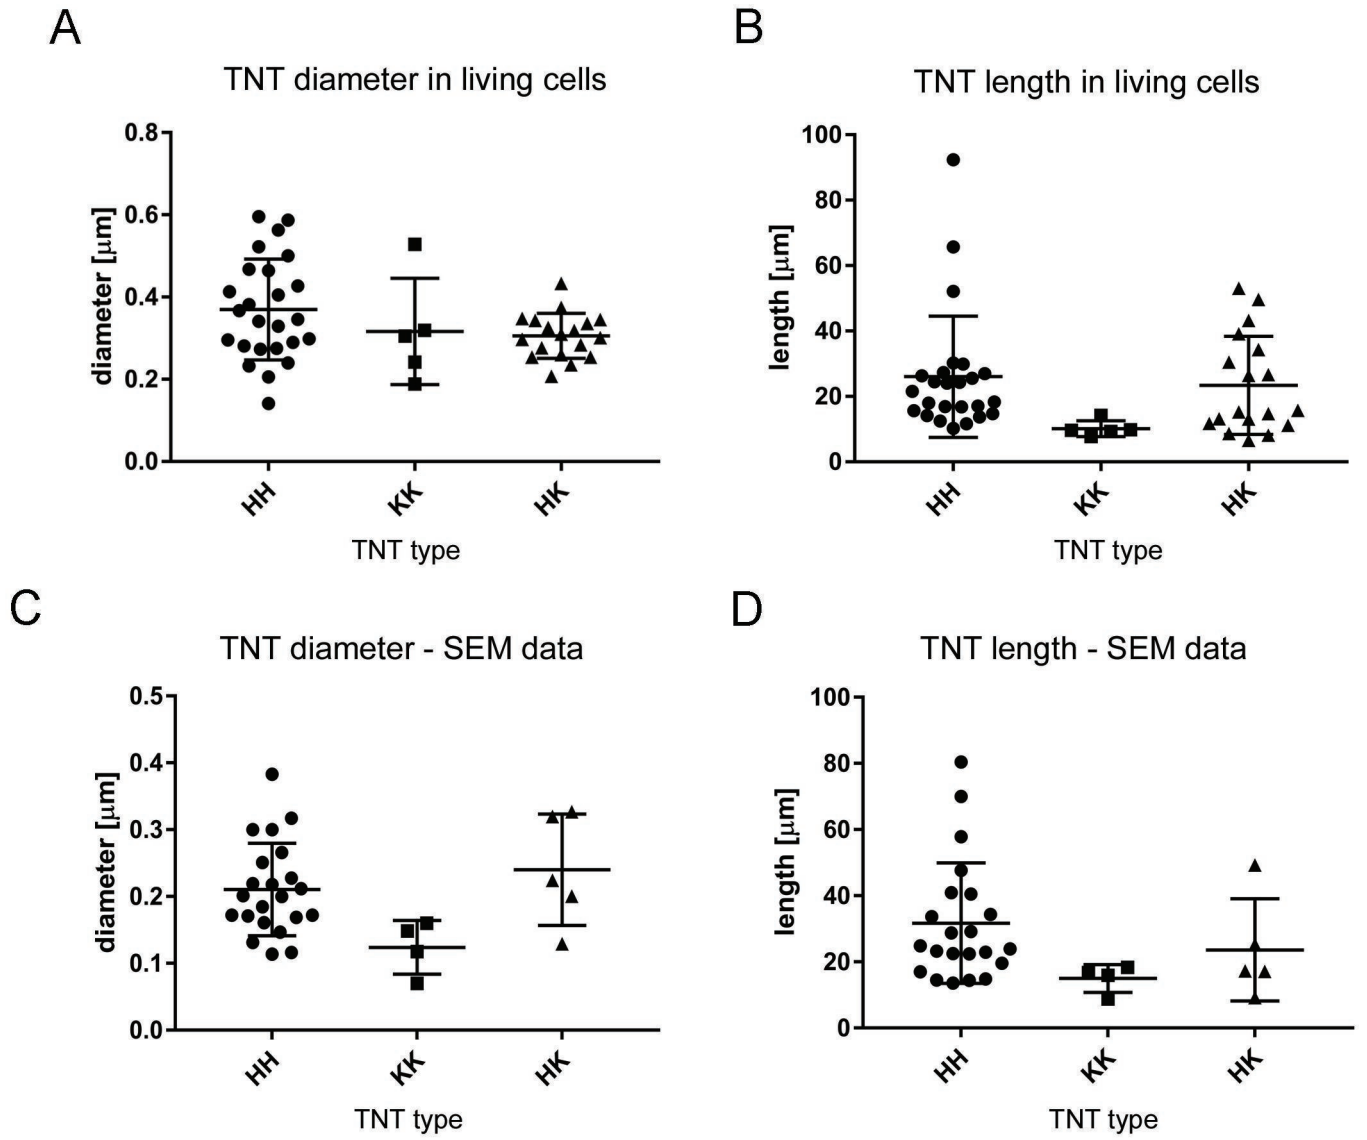

Supplementary Figure S1

Average lengths of heterotypic TNTs

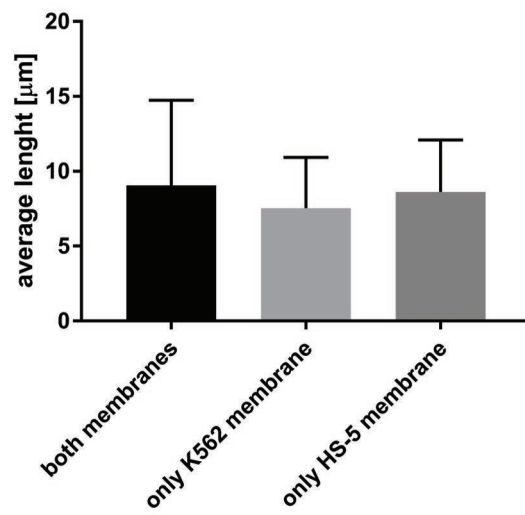

Supplementary Figure S2

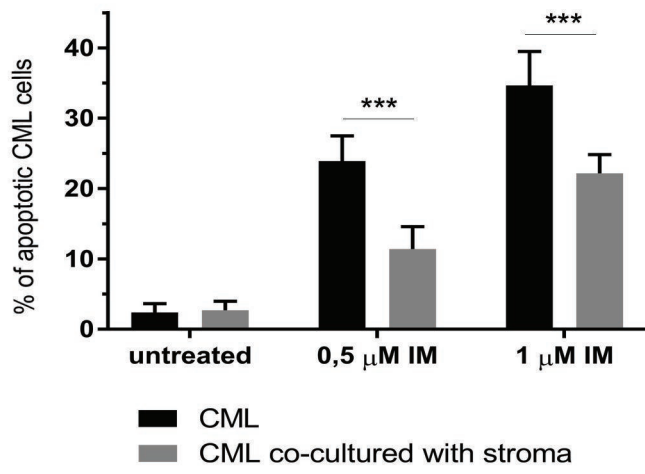

Supplementary Figure S3

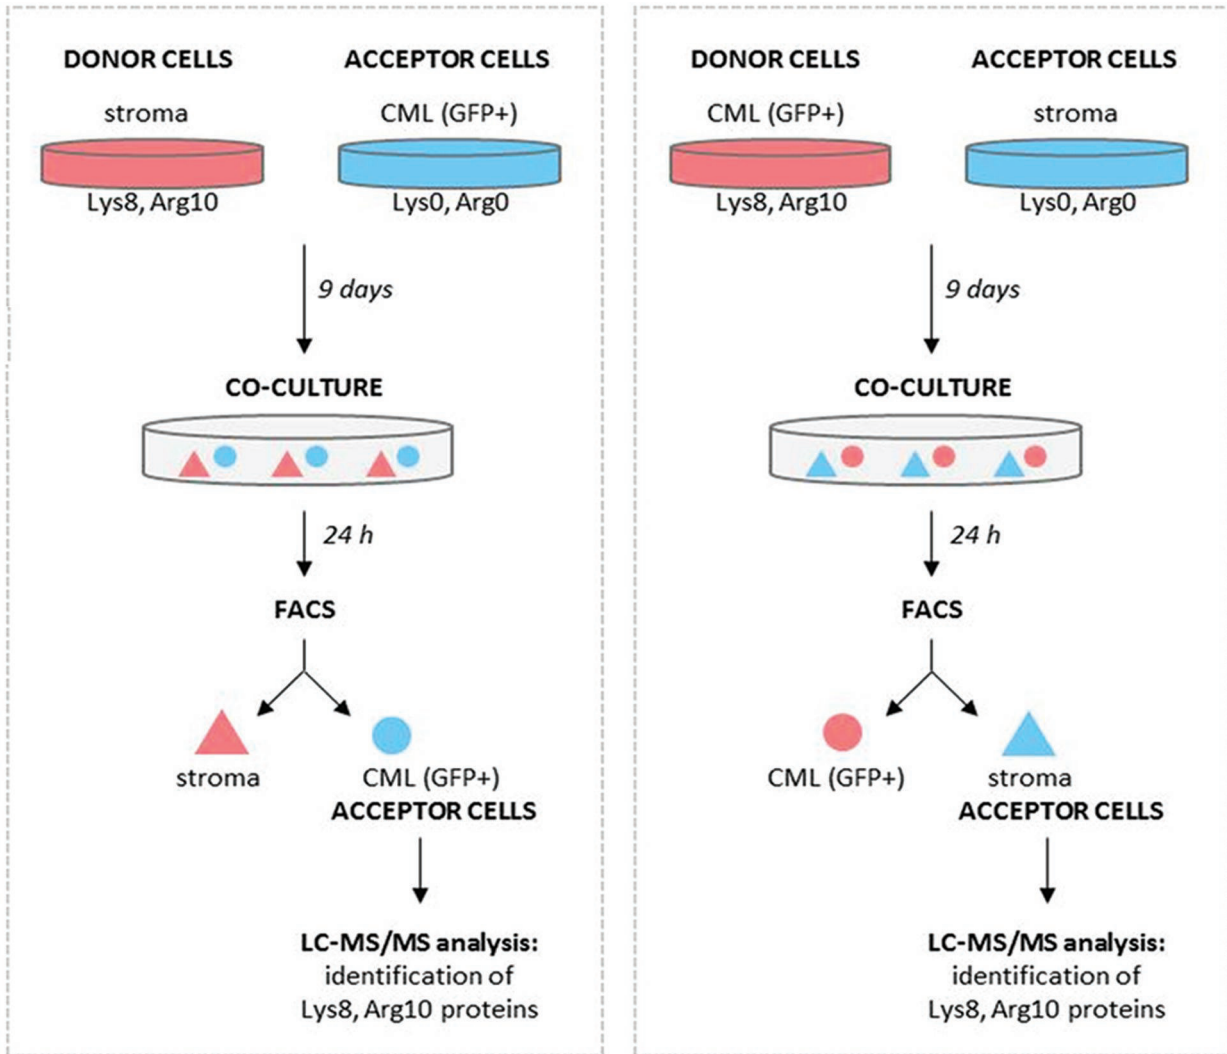

Supplementary Figure S4

A

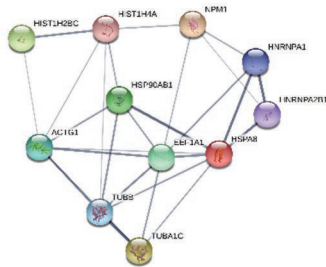

B

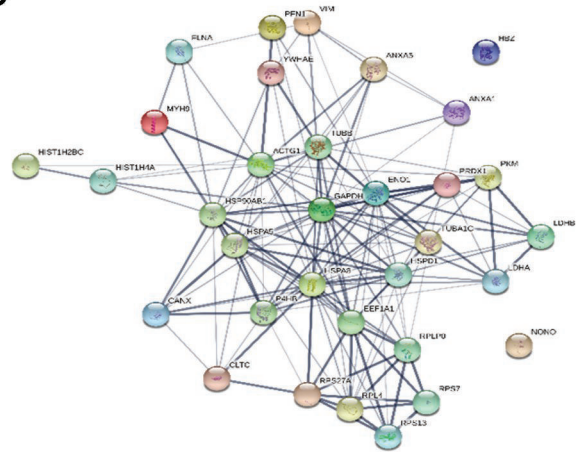

C

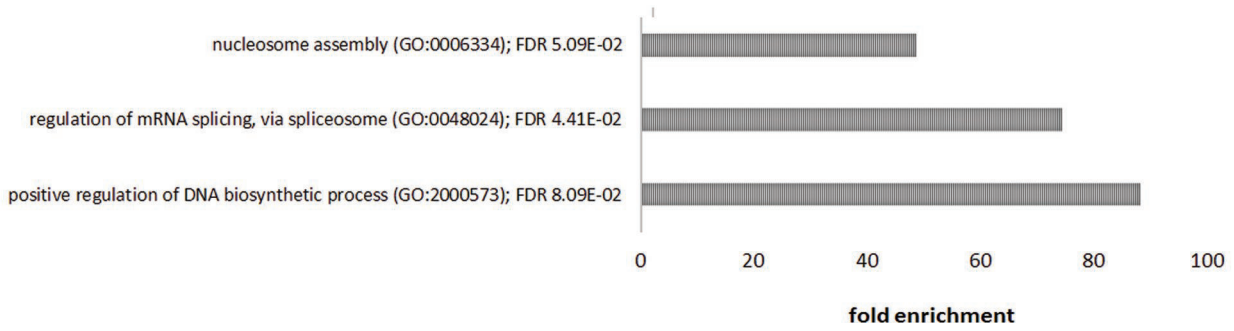

D

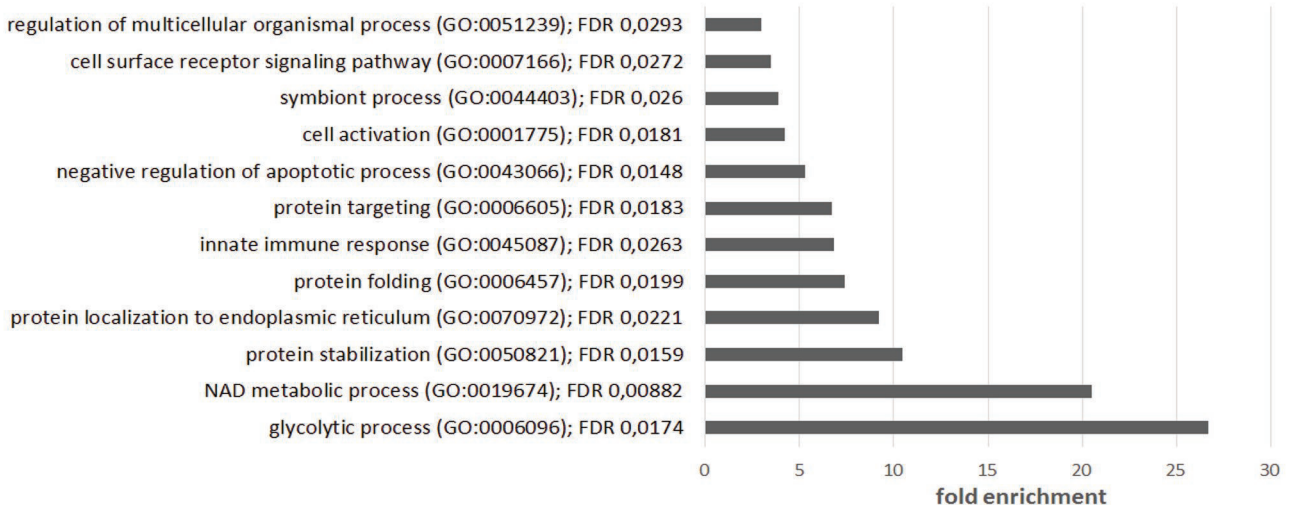

Supplement: Supplementary file [file 425041-1.pdf]
